# Supplementary material
Source: HighWire-hosted journal article supplement (https://diabetes.diabetesjournals.org/content/suppl/2004/03/10/53.04.04.db03-0997)
Supplement: 0997_Appendix_Fig1_Legend_and_Text.pdf [file 0997_Appendix_Fig1_Legend_and_Text.pdf]

**APPENDIX FIGURE 1.** Pair-wise marker LD between SNPs around the *HNF4A* region.

The lower left and upper right triangles describe pair-wise LD in cases and controls,

respectively. A:  $|D'|$ . B:  $r^2$ .

### **APPENDIX FIGURE 1 METHODS**

Pair-wise marker LD measures ( $|D'|$  and  $r^2$ ) were estimated using the EM algorithm (1). A pictogram describing pair-wise marker LD was created using a program written in SAS (Cary, NC).

### **REFERENCE**

1. Excoffier L, Slatkin M (1995) Maximum-likelihood estimation of molecular haplotype frequencies in a diploid population. *Mol Biol Evol* 12:921-927
